# Supplementary material for: Personalized prediction of EGFR mutation-induced drug resistance in lung cancer
Source: PubMed Central journal article supplement — Sci Rep. 2013 Oct 4;3:2855. doi: 10.1038/srep02855 (PMC3790204; doi:10.1038/srep02855), 2013-10-04
Supplement: srep02855-s1.pdf [file srep02855-s1.pdf]

# **Personalized prediction of EGFR mutation-induced drug resistance in lung cancer**

Debby D. Wang<sup>1\*</sup>, Weiqiang Zhou<sup>1</sup>, Hong Yan<sup>1</sup>, Maria Wong<sup>2</sup>, Victor Lee<sup>2</sup>

<sup>1</sup>*Department of Electronic Engineering, City University of Hong Kong, Kowloon, Hong Kong*

<sup>2</sup>*Li Ka Shing Faculty of Medicine, The University of Hong Kong, Pokfulam, Hong Kong*

\*Corresponding author

E-mail addresses:

[D.D.W.: danwang6-c@my.cityu.edu.hk](mailto:danwang6-c@my.cityu.edu.hk)

[W.Z.: kenandzhou@hotmail.com](mailto:kenandzhou@hotmail.com)

[H.Y.: h.yan@cityu.edu.hk](mailto:h.yan@cityu.edu.hk)

[M.W.: mwpik@hku.hk](mailto:mwpik@hku.hk)

[V.L.: vhflee@hku.hk](mailto:vhflee@hku.hk)

## Supplementary information

### Supplementary Table 1. Binding free energies and their components

This table lists the binding free energies and their components for EGFR mutants (including the WT protein) with inhibitors gefitinib or erlotinib. These components encompass energy components of Van der Waals forces (VDW), electrostatic interactions (EEL), and the polar (EPB) and non-polar (ENPOLAR) terms of the solvation free energies.

| Mutation            | gefitinib |          |          |             |          | erlotinib |          |          |             |          |
|---------------------|-----------|----------|----------|-------------|----------|-----------|----------|----------|-------------|----------|
|                     | A<br>VDW  | B<br>EEL | C<br>EPB | D<br>ENPOLA | TOTAL    | A<br>VDW  | B<br>EEL | C<br>EPB | D<br>ENPOLA | TOTAL    |
| Wild-Type           | -50.2296  | -11.1671 | 38.9803  | -35.4615    | -57.8778 | -50.6681  | -20.8587 | 43.3936  | -33.3898    | -61.523  |
| delE709_T710insD    | -44.6069  | -13.964  | 39.4971  | -31.4007    | -50.4746 | -53.6351  | -19.6767 | 42.6918  | -35.3254    | -65.9455 |
| delE746_A750        | -50.5251  | -22.0131 | 46.8522  | -34.3009    | -59.9869 | -50.1603  | -19.8216 | 41.8836  | -33.8104    | -61.9088 |
| delE746_A750insAP   | -51.9638  | -15.1619 | 43.2361  | -34.7622    | -58.6518 | -53.8646  | -27.055  | 51.9279  | -35.456     | -64.4478 |
| delE746_S752insV    | -48.8281  | -13.0112 | 41.0875  | -34.0521    | -54.804  | -55.6001  | -15.3985 | 37.3355  | -35.9611    | -69.6242 |
| delE746_T751insA    | -47.837   | -13.729  | 43.0336  | -33.4805    | -52.0129 | -54.0127  | -18.2783 | 45.4917  | -35.4571    | -62.2566 |
| delE746_T751insI    | -50.4453  | -29.1852 | 48.0859  | -35.7435    | -67.2881 | -51.8367  | -24.4881 | 48.8697  | -34.6179    | -62.0731 |
| delE746_T751insV    | -51.9404  | -31.1156 | 45.7566  | -36.121     | -73.4205 | -48.3525  | -22.6061 | 43.5498  | -32.3339    | -59.7426 |
| delE746_T751insVA   | -49.1903  | -12.9124 | 41.4606  | -33.8416    | -54.4837 | -51.7018  | -23.5795 | 47.7204  | -33.9372    | -61.4981 |
| delL747_A750insP    | -43.9295  | -14.4339 | 41.8619  | -31.2248    | -47.7263 | -51.5153  | -19.9035 | 44.7871  | -33.7622    | -60.394  |
| delL747_A755insSKG  | -49.5679  | -29.6112 | 43.0473  | -35.1745    | -71.3063 | -55.103   | -17.8136 | 40.1929  | -35.7582    | -68.4818 |
| delL747_K754insANKG | -40.4989  | -14.9861 | 37.8217  | -29.4278    | -47.0911 | -52.3439  | -20.8041 | 42.4109  | -34.0711    | -64.8083 |
| delL747_P753insS    | -48.5144  | -8.1678  | 39.0625  | -33.2823    | -50.902  | -52.276   | -17.6311 | 39.7891  | -34.2095    | -64.3275 |
| delL747_T751        | -48.3858  | -28.1914 | 41.512   | -34.4295    | -69.4947 | -50.8573  | -23.0883 | 49.1875  | -34.1398    | -58.8978 |
| delL747_T751insP    | -50.0991  | -29.8346 | 47.6035  | -36.2848    | -68.6149 | -55.2224  | -20.6304 | 43.2604  | -36.4882    | -69.0806 |
| delT751_I759insN    | -41.8782  | -8.3131  | 29.7125  | -28.0847    | -48.5636 | -48.6189  | -15.2223 | 40.6432  | -31.2655    | -54.4634 |
| delT751_I759insS    | -39.9473  | -12.1323 | 35.9476  | -27.9353    | -44.0673 | -52.4828  | -21.6551 | 48.2974  | -34.7362    | -60.5767 |
| dulA767_V769        | -48.2267  | -29.3215 | 43.4074  | -34.5519    | -68.6928 | -45.8776  | -15.6426 | 37.882   | -30.7301    | -54.3683 |
| dulH773             | -52.2024  | -13.9438 | 42.2407  | -35.3819    | -59.2875 | -51.4803  | -23.9338 | 43.9719  | -33.5343    | -64.9766 |
| dulN771_H773        | -48.8178  | -9.2522  | 38.4781  | -34.2916    | -53.8835 | -53.2489  | -24.3099 | 48.3375  | -34.9052    | -64.1266 |
| dulS768_D770        | -51.0018  | -29.4648 | 41.0202  | -36.7985    | -76.245  | -53.1133  | -17.3574 | 35.9135  | -34.6236    | -69.1808 |
| E709A_G719A         | -48.2037  | -12.671  | 43.3123  | -34.6407    | -52.203  | -51.5416  | -21.6045 | 43.8046  | -34.89      | -64.2316 |
| E709K_L858R         | -51.1386  | -26.5117 | 39.5874  | -35.8846    | -73.9475 | -53.4238  | -16.8942 | 38.2251  | -35.629     | -67.722  |
| G719A               | -50.831   | -12.1123 | 42.9616  | -35.2798    | -55.2615 | -54.594   | -21.4969 | 44.2138  | -35.8647    | -67.7419 |
| G719A_L858R         | -51.2702  | -24.9909 | 38.0397  | -36.5486    | -74.77   | -40.8519  | -12.6117 | 30.7745  | -27.5597    | -50.2489 |
| G719A_L861Q         | -50.015   | -13.0452 | 42.705   | -34.5537    | -54.9089 | -52.1044  | -17.057  | 42.0316  | -34.637     | -61.7669 |
| G719C_S768I         | -49.137   | -13.7779 | 44.3125  | -34.9308    | -53.5332 | -52.1466  | -25.0559 | 48.8176  | -35.1527    | -63.5377 |
| G724S               | -50.0229  | -29.1782 | 43.808   | -34.7247    | -70.1177 | -52.2282  | -25.4595 | 46.2447  | -34.3403    | -65.7834 |
| G724S_L861Q         | -48.5007  | -28.2794 | 42.7513  | -35.353     | -69.3818 | -51.5827  | -18.7275 | 43.1828  | -33.5062    | -60.6336 |
| K757R               | -43.5618  | -8.2131  | 37.2485  | -30.2061    | -44.7325 | -53.4485  | -22.6986 | 46.0288  | -35.3252    | -65.4435 |
| L858R               | -51.914   | -26.6512 | 38.5811  | -36.8522    | -76.8363 | -51.9583  | -17.1889 | 37.3161  | -35.0457    | -66.8767 |
| L858R_L861F         | -50.64    | -24.7729 | 39.3362  | -34.5994    | -70.676  | -49.8005  | -16.274  | 40.0645  | -32.401     | -58.411  |
| L861Q               | -52.9783  | -14.3818 | 41.1706  | -36.0401    | -62.2296 | -51.6732  | -17.2987 | 35.5735  | -33.1594    | -66.5579 |
| L861R               | -49.7817  | -15.9736 | 43.86    | -34.0732    | -55.9686 | -48.8189  | -17.7707 | 38.5243  | -32.4751    | -60.5404 |
| R776H_L858R         | -49.61    | -27.9452 | 43.7866  | -35.2183    | -68.9869 | -49.7391  | -16.8023 | 39.8449  | -32.6329    | -59.3294 |
| R831H               | -51.0384  | -30.234  | 45.0242  | -35.3571    | -71.6053 | -54.2734  | -15.6523 | 35.8019  | -35.5799    | -69.7037 |
| S768I_V774M         | -49.7211  | -9.8949  | 37.34    | -34.394     | -56.67   | -53.1199  | -21.532  | 42.7696  | -34.8986    | -66.7809 |
| T854A_L858R         | -47.5049  | -20.0659 | 37.8568  | -33.7666    | -63.4806 | -47.7159  | -14.8403 | 40.2891  | -32.0103    | -54.2773 |
